# Supplementary material for: Acute Inflammation Induces Neuroendocrine and Opioid Receptor Genes Responses in the Seabass Dicentrarchus labrax Brain
Source: MDPI journal article supplement (doi:10.3390/biology11030364), 2022-02-24
Supplement: s1 [file s1]

**Supplementary Table S1. Telencephalic expression of neuroendocrine genes in the European seabass i.p. injected with Freud's Incomplete Adjuvant (FIA) or Hank's Balanced Salt Solution (CTRL) and sampled at 4, 24, 48 or 72 h post injection.**

| <i>Parameters</i> | 0h            |      | 4h              | 24h            | 48h            | 72h            |
|-------------------|---------------|------|-----------------|----------------|----------------|----------------|
| <i>gr1</i>        | 0.96 ± 0.09   | CTRL | 0.95 ± 0.11     | 0.86 ± 0.20    | 0.73 ± 0.10    | 0.74 ± 0.11    |
|                   |               | FIA  | 1.12 ± 0.24     | 0.87 ± 0.24    | 0.89 ± 0.22    | 0.78 ± 0.11    |
| <i>gr2</i>        | 1.06 ± 0.07#  | CTRL | 0.99 ± 0.17     | 0.99 ± 0.19    | 0.86 ± 0.10    | 0.77 ± 0.05 *  |
|                   |               | FIA  | 1.06 ± 0.05     | 0.93 ± 0.13    | 0.91 ± 0.13    | 0.78 ± 0.04 *  |
| <i>htr1aβ</i>     | 1.05 ± 0.37   | CTRL | 0.85 ± 0.19     | 0.79 ± 0.13    | 0.65 ± 0.13 A  | 0.97 ± 0.19    |
|                   |               | FIA  | 1.04 ± 0.40 ab  | 0.67 ± 0.10 a  | 1.09 ± 0.16 Bb | 0.96 ± 0.26 ab |
| <i>htr2a</i>      | 1.02 ± 0.22   | CTRL | 1.09 ± 0.27     | 1.06 ± 0.30    | 0.98 ± 0.13    | 0.76 ± 0.23    |
|                   |               | FIA  | 1.24 ± 0.24     | 0.78 ± 0.13    | 1.15 ± 0.43    | 0.90 ± 0.15    |
| <i>htr2b</i>      | 0.96 ± 0.13 * | CTRL | 1.25 ± 0.34     | 1.10 ± 0.14    | 0.89 ± 0.02    | 0.99 ± 0.06    |
|                   |               | FIA  | 1.41 ± 0.28 #   | 1.00 ± 0.21    | 1.23 ± 0.21    | 1.20 ± 0.11    |
| <i>htr2c</i>      | 1.01 ± 0.18 * | CTRL | 1.07 ± 0.29     | 1.17 ± 0.41 B  | 0.95 ± 0.07    | 0.77 ± 0.13    |
|                   |               | FIA  | 1.46 ± 0.14 #b  | 0.75 ± 0.12 Aa | 1.00 ± 0.33 a  | 0.91 ± 0.18 a  |
| <i>ogfr1</i>      | 1.02 ± 0.23   | CTRL | 0.93 ± 0.12 A   | 0.95 ± 0.12    | 0.81 ± 0.05    | 0.76 ± 0.15    |
|                   |               | FIA  | 1.29 ± 0.25 Bb  | 0.78 ± 0.12 a  | 0.91 ± 0.12 a  | 1.00 ± 0.09 a  |
| <i>ogfr2</i>      | 1.07 ± 0.44   | CTRL | 0.84 ± 0.16 a   | 1.79 ± 1.00 Bb | 1.06 ± 0.78 ab | 1.34 ± 0.28 ab |
|                   |               | FIA  | 0.82 ± 0.24     | 0.81 ± 0.18 A  | 1.25 ± 0.32    | 1.14 ± 0.14    |
| <i>kor1</i>       | 1.01 ± 0.15   | CTRL | 0.88 ± 0.10     | 0.96 ± 0.23    | 0.70 ± 0.14    | 0.88 ± 0.25    |
|                   |               | FIA  | 1.07 ± 0.10 b   | 0.74 ± 0.10 a  | 0.94 ± 0.21 ab | 0.87 ± 0.12 ab |
| <i>kor2</i>       | 1.04 ± 0.15   | CTRL | 0.82 ± 0.21     | 0.85 ± 0.26    | 0.70 ± 0.03    | 0.73 ± 0.31    |
|                   |               | FIA  | 1.05 ± 0.19     | 0.75 ± 0.21    | 0.84 ± 0.09    | 0.69 ± 0.27    |
| <i>nopr</i>       | 1.06 ± 0.06 # | CTRL | 1.01 ± 0.26     | 0.68 ± 0.18 *  | 0.66 ± 0.10 *  | 0.59 ± 0.07 *  |
|                   |               | FIA  | 0.95 ± 0.20     | 0.51 ± 0.02 *  | 0.78 ± 0.23    | 0.57 ± 0.13 *  |
| <i>muor</i>       | 1.01 ± 0.17 * | CTRL | 1.01 ± 0.21 A   | 1.00 ± 0.28    | 0.90 ± 0.13 A  | 0.92 ± 0.24    |
|                   |               | FIA  | 1.43 ± 0.25 #Bb | 0.81 ± 0.16 a  | 1.30 ± 0.30 Bb | 0.92 ± 0.19 a  |
| <i>dor2</i>       | 0.95 ± 0.23   | CTRL | 0.69 ± 0.31     | 0.68 ± 0.40    | 0.64 ± 0.24    | 0.55 ± 0.20    |
|                   |               | FIA  | 1.24 ± 0.34     | 0.66 ± 0.07    | 0.82 ± 0.18    | 0.74 ± 0.37    |
| <i>tph1</i>       | 0.93 ± 0.16   | CTRL | 1.35 ± 0.47     | 0.95 ± 0.33    | 0.69 ± 0.20    | 0.86 ± 0.21    |
|                   |               | FIA  | 1.36 ± 0.69     | 0.74 ± 0.21    | 0.92 ± 0.15    | 0.84 ± 0.32    |

| Two-way ANOVA |        |          |                    |      |     |     |     |          |     | One-way ANOVA |                   |
|---------------|--------|----------|--------------------|------|-----|-----|-----|----------|-----|---------------|-------------------|
| Parameters    |        |          |                    | Time |     |     |     | Stimulus |     | Parameters    | i.p.<br>injection |
|               | Time   | Stimulus | Time ×<br>Stimulus | 4h   | 24h | 48h | 72h | CTRL     | FIA |               |                   |
| <i>gr1</i>    | 0.003  | -        | -                  | b    | ab  | a   | a   | -        | -   | <i>gr1</i>    | -                 |
| <i>gr2</i>    | <0.001 | -        | -                  | c    | bc  | ab  | a   | -        | -   | <i>gr2</i>    | <0.001            |
| <i>htr1aβ</i> | 0.04   | -        | 0.012              | ab   | a   | ab  | b   | -        | -   | <i>htr1aβ</i> | -                 |
| <i>htr2a</i>  | 0.01   | -        | -                  | b    | ab  | ab  | a   | -        | -   | <i>htr2a</i>  | -                 |
| <i>htr2b</i>  | 0.003  | 0.014    | -                  | b    | a   | a   | a   | A        | B   | <i>htr2b</i>  | <0.001            |
| <i>htr2c</i>  | -      | -        | 0.001              | -    | -   | -   | -   | -        | -   | <i>htr2c</i>  | <0.001            |
| <i>ogfr1</i>  | -      | -        | <0.001             | -    | -   | -   | -   | -        | -   | <i>ogfr1</i>  | -                 |
| <i>ogfr2</i>  | -      | -        | 0.026              | -    | -   | -   | -   | -        | -   | <i>ogfr2</i>  | -                 |
| <i>kor1</i>   | -      | -        | 0.003              | -    | -   | -   | -   | -        | -   | <i>kor1</i>   | -                 |
| <i>kor2</i>   | -      | -        | -                  | -    | -   | -   | -   | -        | -   | <i>kor2</i>   | -                 |
| <i>nopr</i>   | <0.001 | -        | -                  | b    | a   | a   | a   | -        | -   | <i>nopr</i>   | <0.001            |
| <i>muor</i>   | -      | -        | 0.001              | -    | -   | -   | -   | -        | -   | <i>muor</i>   | <0.001            |
| <i>dor2</i>   | 0.033  | 0.01     | -                  | b    | ab  | ab  | a   | A        | B   | <i>dor2</i>   | -                 |
| <i>tph1</i>   | <0.001 | -        | -                  | b    | a   | a   | a   | -        | -   | <i>tph1</i>   | -                 |

Values are presented as means ± SD (n=9). P-values from two-way and one-way ANOVA ( $p \leq 0.05$ ). If interaction was significant, Tukey post hoc test was used to identify differences in the experimental treatments. Different capital letters stand for significant differences between the two stimuli. Low case letters represent differences among sampling time. Different symbols indicate significant differences between i.p. injected and undisturbed fish.

**Supplementary Table S2. Optic tectum expression of neuroendocrine genes in the European seabass i.p. injected with Freud's Incomplete Adjuvant (FIA) or Hank's Balanced Salt Solution (CTRL) and sampled at 4, 24, 48 or 72 h post injection.**

| <i>Parameters</i> | 0h            |      | 4h              | 24h             | 48h             | 72h            |
|-------------------|---------------|------|-----------------|-----------------|-----------------|----------------|
| <i>gr1</i>        | 1.04 ± 0.32   | CTRL | 1.32 ± 0.09     | 1.11 ± 0.18     | 1.20 ± 0.20     | 1.23 ± 0.13    |
|                   |               | FIA  | 0.95 ± 0.12     | 0.92 ± 0.10     | 1.08 ± 0.11     | 1.22 ± 0.23    |
| <i>gr2</i>        | 1.11 ± 0.48 # | CTRL | 1.16 ± 0.24 B   | 1.06 ± 0.08     | 0.96 ± 0.14     | 0.96 ± 0.14    |
|                   |               | FIA  | 0.68 ± 0.12 *Aa | 1.01 ± 0.13 b   | 1.14 ± 0.03 b   | 1.11 ± 0.13 b  |
| <i>htr1aβ</i>     | 1.03 ± 0.28   | CTRL | 1.12 ± 0.17     | 1.16 ± 0.20     | 1.11 ± 0.14     | 1.02 ± 0.31    |
|                   |               | FIA  | 0.89 ± 0.15     | 1.07 ± 0.33     | 0.98 ± 0.21     | 0.91 ± 0.20    |
| <i>htr2a</i>      | 0.97 ± 0.08   | CTRL | 1.20 ± 0.30     | 1.26 ± 0.28     | 1.19 ± 0.16     | 0.96 ± 0.27    |
|                   |               | FIA  | 1.06 ± 0.14     | 1.00 ± 0.12     | 0.99 ± 0.21     | 0.97 ± 0.20    |
| <i>htr2b</i>      | 1.09 ± 0.42   | CTRL | 1.35 ± 0.28     | 1.25 ± 0.46     | 0.97 ± 0.07     | 0.89 ± 0.07    |
|                   |               | FIA  | 0.90 ± 0.21     | 1.25 ± 0.28     | 1.08 ± 0.35     | 1.09 ± 0.38    |
| <i>htr2c</i>      | 1.03 ± 0.28   | CTRL | 1.33 ± 0.29     | 1.30 ± 0.28     | 1.34 ± 0.28     | 1.45 ± 0.34    |
|                   |               | FIA  | 0.84 ± 0.28     | 1.19 ± 0.24     | 1.22 ± 0.14     | 1.45 ± 0.28    |
| <i>ogfr1</i>      | 0.94 ± 0.16   | CTRL | 1.12 ± 0.15 B   | 1.10 ± 0.13     | 0.86 ± 0.15     | 1.01 ± 0.25    |
|                   |               | FIA  | 0.71 ± 0.23 A   | 0.91 ± 0.15     | 0.89 ± 0.16     | 0.97 ± 0.17    |
| <i>ogfr2</i>      | 1.03 ± 0.27 * | CTRL | 0.91 ± 0.27 a   | 3.51 ± 0.63 #Bc | 1.66 ± 0.63 #Bb | 1.04 ± 0.24 ab |
|                   |               | FIA  | 0.69 ± 0.08     | 1.01 ± 0.27 A   | 0.97 ± 0.08 A   | 0.88 ± 0.26    |
| <i>kor1</i>       | 0.90 ± 0.20   | CTRL | 1.07 ± 0.26     | 1.08 ± 0.09     | 1.32 ± 0.49     | 1.19 ± 0.25    |
|                   |               | FIA  | 1.19 ± 0.28 ab  | 1.39 ± 0.56 b   | 1.04 ± 0.21 ab  | 0.78 ± 0.19 a  |
| <i>kor2</i>       | 1.07 ± 0.44   | CTRL | 1.09 ± 0.25     | 1.15 ± 0.20     | 0.92 ± 0.12     | 0.88 ± 0.14    |
|                   |               | FIA  | 0.78 ± 0.14     | 0.94 ± 0.13     | 0.83 ± 0.14     | 0.73 ± 0.22    |
| <i>nopr</i>       | 1.01 ± 0.17   | CTRL | 1.29 ± 0.26 Bb  | 1.28 ± 0.23 Bb  | 0.78 ± 0.16 a   | 0.82 ± 0.12 a  |
|                   |               | FIA  | 0.87 ± 0.14 A   | 0.88 ± 0.19 A   | 0.81 ± 0.17     | 0.80 ± 0.14    |
| <i>muor</i>       | 0.93 ± 0.21 * | CTRL | 1.31 ± 0.19 #   | 1.08 ± 0.19     | 1.02 ± 0.12     | 1.15 ± 0.24    |
|                   |               | FIA  | 1.02 ± 0.23     | 0.96 ± 0.14     | 0.89 ± 0.07     | 1.01 ± 0.21    |
| <i>dor2</i>       | 1.07 ± 0.40   | CTRL | 1.14 ± 0.31     | 1.46 ± 0.24     | 1.11 ± 0.17     | 1.32 ± 0.30    |
|                   |               | FIA  | 0.83 ± 0.24     | 1.23 ± 0.14     | 1.12 ± 0.33     | 1.17 ± 0.16    |
| <i>tph1</i>       | 1.20 ± 0.71   | CTRL | 1.61 ± 1.01     | 1.45 ± 0.57     | 1.66 ± 1.08     | 0.91 ± 0.49    |
|                   |               | FIA  | 0.98 ± 0.72     | 0.94 ± 0.73     | 1.41 ± 0.40     | 0.88 ± 0.36    |

| Two-way ANOVA |       |          |                 |      |     |     |     |          |     | One-way ANOVA |                |
|---------------|-------|----------|-----------------|------|-----|-----|-----|----------|-----|---------------|----------------|
| Parameters    | Time  | Stimulus | Time × Stimulus | Time |     |     |     | Stimulus |     | Parameters    | i.p. injection |
|               |       |          |                 | 4h   | 24h | 48h | 72h | CTRL     | FIA |               |                |
| <i>gr1</i>    | 0.012 | <0.001   | -               | ab   | a   | ab  | b   | B        | A   | <i>gr1</i>    | -              |
| <i>gr2</i>    | -     | -        | <0.001          | -    | -   | -   | -   | -        | -   | <i>gr2</i>    | 0.012          |
| <i>htr1aβ</i> | -     | 0.032    | -               | -    | -   | -   | -   | B        | A   | <i>htr1aβ</i> | -              |
| <i>htr2a</i>  | -     | 0.019    | -               | -    | -   | -   | -   | B        | A   | <i>htr2a</i>  | -              |
| <i>htr2b</i>  | -     | -        | -               | -    | -   | -   | -   | -        | -   | <i>htr2b</i>  | -              |
| <i>htr2c</i>  | 0.011 | 0.023    | -               | a    | ab  | ab  | b   | B        | A   | <i>htr2c</i>  | -              |
| <i>ogfr1</i>  | -     | -        | 0.018           | -    | -   | -   | -   | -        | -   | <i>ogfr1</i>  | -              |
| <i>ogfr2</i>  | -     | -        | <0.001          | -    | -   | -   | -   | -        | -   | <i>ogfr2</i>  | <0.001         |
| <i>kor1</i>   | -     | -        | 0.046           | -    | -   | -   | -   | -        | -   | <i>kor1</i>   | -              |
| <i>kor2</i>   | 0.01  | <0.001   | -               | ab   | b   | ab  | a   | B        | A   | <i>kor2</i>   | -              |
| <i>nopr</i>   | -     | -        | 0.002           | -    | -   | -   | -   | -        | -   | <i>nopr</i>   | <0.001         |
| <i>muor</i>   | 0.046 | 0.002    | -               | b    | ab  | a   | ab  | B        | A   | <i>muor</i>   | 0.01           |
| <i>dor2</i>   | 0.003 | 0.014    | -               | a    | b   | ab  | b   | B        | A   | <i>dor2</i>   | -              |
| <i>tph1</i>   | -     | -        | -               | -    | -   | -   | -   | -        | -   | <i>tph1</i>   | -              |

Values are presented as means ± SD (n=9). P-values from two-way and one-way ANOVA ( $p \leq 0.05$ ). If interaction was significant, Tukey post hoc test was used to identify differences in the experimental treatments. Different capital letters stand for significant differences among sampling time. Low case letters represent differences between the two stimuli. Different symbols indicate significant differences between i.p. injected and undisturbed fish.

**Supplementary Table S3. Hypothalamic expression of neuroendocrine genes in the European seabass i.p. injected with Freud's Incomplete Adjuvant (FIA) or Hank's Balanced Salt Solution (CTRL) and sampled at 4, 24, 48 or 72 h post injection.**

| Parameters    | 0h            |      | 4h             | 24h             | 48h             | 72h            |
|---------------|---------------|------|----------------|-----------------|-----------------|----------------|
| <i>gr1</i>    | 1.04 ± 0.32 * | CTRL | 0.88 ± 0.18 a  | 0.90 ± 0.14 a   | 1.21 ± 0.20 Aa  | 1.61 ± 0.15 #b |
|               |               | FIA  | 1.04 ± 0.14 a  | 1.20 ± 0.10 a   | 1.68 ± 0.12 #Bb | 1.57 ± 0.38 #b |
| <i>gr2</i>    | 1.07 ± 0.07   | CTRL | 0.94 ± 0.12 ab | 0.79 ± 0.11 a   | 0.85 ± 0.17 Aab | 1.13 ± 0.14 b  |
|               |               | FIA  | 0.85 ± 0.16 a  | 0.97 ± 0.06 ab  | 1.30 ± 0.14 Bb  | 1.27 ± 0.32 ab |
| <i>crh</i>    | 0.93 ± 0.27 * | CTRL | 1.36 ± 0.26 ab | 1.27 ± 0.32 a   | 1.33 ± 0.17 ab  | 1.78 ± 0.16 #b |
|               |               | FIA  | 0.94 ± 0.11 a  | 0.95 ± 0.22 a   | 1.53 ± 0.51 #b  | 1.92 ± 0.42 #b |
| <i>crhbp</i>  | 1.10 ± 0.54   | CTRL | 1.09 ± 0.51    | 0.92 ± 0.37     | 0.94 ± 0.23     | 1.48 ± 0.30    |
|               |               | FIA  | 1.01 ± 0.42    | 0.54 ± 0.20     | 0.87 ± 0.19     | 1.44 ± 0.47    |
| <i>htr1aβ</i> | 1.03 ± 0.27   | CTRL | 1.08 ± 0.17 ab | 0.84 ± 0.19 a   | 0.97 ± 0.22 Aa  | 1.30 ± 0.08 b  |
|               |               | FIA  | 0.96 ± 0.22 a  | 0.84 ± 0.20 a   | 1.31 ± 0.14 Bb  | 1.26 ± 0.07 b  |
| <i>htr2a</i>  | 0.95 ± 0.10   | CTRL | 0.89 ± 0.14    | 0.71 ± 0.11     | 0.96 ± 0.26     | 0.82 ± 0.19    |
|               |               | FIA  | 0.85 ± 0.23    | 0.71 ± 0.25     | 1.04 ± 0.19     | 0.90 ± 0.14    |
| <i>htr2b</i>  | 0.97 ± 0.26   | CTRL | 0.84 ± 0.41    | 0.89 ± 0.36     | 0.88 ± 0.33     | 1.20 ± 0.16    |
|               |               | FIA  | 0.80 ± 0.18    | 1.01 ± 0.40     | 1.13 ± 0.20     | 1.22 ± 0.22    |
| <i>htr2c</i>  | 0.96 ± 0.10   | CTRL | 1.18 ± 0.26    | 0.82 ± 0.23     | 0.91 ± 0.11     | 1.15 ± 0.21    |
|               |               | FIA  | 0.95 ± 0.22    | 0.85 ± 0.17     | 1.19 ± 0.27     | 1.13 ± 0.32    |
| <i>ogfr1</i>  | 0.96 ± 0.11 * | CTRL | 1.06 ± 0.26 ab | 0.83 ± 0.16 a   | 0.86 ± 0.14 Aa  | 1.36 ± 0.21 #b |
|               |               | FIA  | 0.86 ± 0.18 a  | 0.97 ± 0.22 a   | 1.36 ± 0.15 #Bb | 1.37 ± 0.25 #b |
| <i>ogfr2</i>  | 1.03 ± 0.25 * | CTRL | 0.97 ± 0.21 a  | 3.30 ± 1.31 #Bb | 1.92 ± 0.64 a   | 1.63 ± 0.38 a  |
|               |               | FIA  | 0.80 ± 0.09    | 1.10 ± 0.13 A   | 1.60 ± 0.03     | 1.62 ± 0.51    |
| <i>kor1</i>   | 1.01 ± 0.18   | CTRL | 0.89 ± 0.16    | 0.75 ± 0.12     | 1.04 ± 0.18     | 1.15 ± 0.13    |
|               |               | FIA  | 0.83 ± 0.06    | 0.87 ± 0.30     | 1.32 ± 0.24     | 1.21 ± 0.30    |
| <i>kor2</i>   | 0.92 ± 0.19 * | CTRL | 1.10 ± 0.13 a  | 1.09 ± 0.60 a   | 1.37 ± 0.29 Aab | 1.88 ± 0.22 #b |
|               |               | FIA  | 1.15 ± 0.19 a  | 1.06 ± 0.45 a   | 2.06 ± 0.39 #Bb | 1.57 ± 0.44 ab |
| <i>nopr</i>   | 1.02 ± 0.06   | CTRL | 0.93 ± 0.22    | 0.70 ± 0.12     | 0.92 ± 0.10     | 1.08 ± 0.33    |
|               |               | FIA  | 0.82 ± 0.28    | 0.70 ± 0.22     | 1.10 ± 0.19     | 0.92 ± 0.13    |
| <i>muor</i>   | 1.38 ± 0.13 # | CTRL | 1.13 ± 0.17    | 0.95 ± 0.33 *   | 1.07 ± 0.10     | 1.31 ± 0.18    |
|               |               | FIA  | 0.96 ± 0.06 *  | 0.98 ± 0.30 *   | 1.39 ± 0.23     | 1.44 ± 0.21    |

|             |               |      |                |                |                |                |
|-------------|---------------|------|----------------|----------------|----------------|----------------|
| <i>dor2</i> | 0.95 ± 0.47 # | CTRL | 0.70 ± 0.23    | 0.67 ± 0.27    | 0.56 ± 0.15 A  | 0.89 ± 0.19    |
|             |               | FIA  | 0.68 ± 0.15 ab | 0.46 ± 0.13 *a | 1.09 ± 0.35 Bc | 1.05 ± 0.20 bc |
| <i>tph1</i> | 1.67 ± 0.42 # | CTRL | 0.66 ± 1.14    | 0.58 ± 0.35 *  | 0.67 ± 0.56    | 0.69 ± 0.65    |
|             |               | FIA  | 0.48 ± 0.33 *  | 0.54 ± 0.53 *  | 1.20 ± 0.15    | 0.67 ± 0.64    |

| Two-way ANOVA |        |          |                 |      |     |     |     |          |     | One-way ANOVA |                |
|---------------|--------|----------|-----------------|------|-----|-----|-----|----------|-----|---------------|----------------|
| Parameters    | Time   | Stimulus | Time × Stimulus | Time |     |     |     | Stimulus |     | Parameters    | i.p. injection |
|               |        |          |                 | 4h   | 24h | 48h | 72h | CTRL     | FIA |               |                |
| <i>gr1</i>    | <0.001 | <0.001   | 0.014           | a    | a   | b   | b   | A        | B   | <i>gr1</i>    | <0.001         |
| <i>gr2</i>    | <0.001 | 0.001    | 0.006           | a    | a   | ab  | b   | A        | B   | <i>gr2</i>    | -              |
| <i>crh</i>    | -      | -        | 0.022           | -    | -   | -   | -   | -        | -   | <i>crh</i>    | <0.001         |
| <i>crhbp</i>  | <0.001 | -        | -               | a    | a   | a   | b   | -        | -   | <i>crhbp</i>  | -              |
| <i>htr1aβ</i> | <0.001 | -        | 0.01            | ab   | a   | b   | b   | -        | -   | <i>htr1aβ</i> | -              |
| <i>htr2a</i>  | 0.006  | -        | -               | ab   | a   | b   | ab  | -        | -   | <i>htr2a</i>  | -              |
| <i>htr2b</i>  | 0.023  | -        | -               | a    | ab  | ab  | b   | -        | -   | <i>htr2b</i>  | -              |
| <i>htr2c</i>  | 0.012  | -        | -               | ab   | a   | ab  | b   | -        | -   | <i>htr2c</i>  | -              |
| <i>ogfr1</i>  | -      | -        | <0.001          | -    | -   | -   | -   | -        | -   | <i>ogfr1</i>  | <0.001         |
| <i>ogfr2</i>  | -      | -        | <0.001          | -    | -   | -   | -   | -        | -   | <i>ogfr2</i>  | <0.001         |
| <i>kor1</i>   | <0.001 | -        | -               | a    | a   | b   | b   | -        | -   | <i>kor1</i>   | -              |
| <i>kor2</i>   | -      | -        | 0.014           | -    | -   | -   | -   | -        | -   | <i>kor2</i>   | <0.001         |
| <i>nopr</i>   | 0.002  | -        | -               | ab   | a   | b   | b   | -        | -   | <i>nopr</i>   | -              |
| <i>muor</i>   | <0.001 | -        | -               | ab   | a   | bc  | c   | -        | -   | <i>muor</i>   | <0.001         |
| <i>dor2</i>   | -      | -        | <0.001          | -    | -   | -   | -   | -        | -   | <i>dor2</i>   | <0.001         |
| <i>tph1</i>   | -      | -        | -               | -    | -   | -   | -   | -        | -   | <i>tph1</i>   | 0.02           |

Values are presented as means ± SD (n=9). P-values from two-way and one-way ANOVA ( $p \leq 0.05$ ). If interaction was significant, Tukey post hoc test was used to identify differences in the experimental treatments. Different capital letters stand for significant differences among sampling time. Low case letters represent differences between the two stimuli. Different symbols indicate significant differences between i.p. injected and undisturbed fish.

**Supplementary Table S4. Pituitary gland expression of neuroendocrine genes in the European seabass i.p. injected with Freud's Incomplete Adjuvant (FIA) or Hank's Balanced Salt Solution (CTRL) and sampled at 4, 24, 48 or 72 h post injection.**

| <i>Parameters</i> | 0h            |      | 4h             | 24h             | 48h            | 72h             |
|-------------------|---------------|------|----------------|-----------------|----------------|-----------------|
| <i>gr1</i>        | 1.11 ± 0.67   | CTRL | 1.70 ± 0.30 b  | 1.11 ± 0.14 a   | 1.13 ± 0.15 a  | 1.10 ± 0.04 a   |
|                   |               | FIA  | 1.61 ± 0.31 b  | 0.89 ± 0.08 a   | 1.34 ± 0.18 b  | 1.02 ± 0.19 a   |
| <i>pomc</i>       | 1.03 ± 0.37   | CTRL | 1.30 ± 0.63    | 1.21 ± 0.16     | 1.39 ± 0.28    | 1.55 ± 0.29     |
|                   |               | FIA  | 1.31 ± 0.25 ab | 0.98 ± 0.25 a   | 1.50 ± 0.30 b  | 1.09 ± 0.28 ab  |
| <i>htr1aβ</i>     | 1.00 ± 0.14 # | CTRL | 0.29 ± 0.07 *b | 0.22 ± 0.02 *ab | 0.11 ± 0.01 *a | 0.14 ± 0.06 *ab |
|                   |               | FIA  | 0.34 ± 0.05 *b | 0.13 ± 0.06 *a  | 0.16 ± 0.08 *a | 0.15 ± 0.07 *a  |
| <i>htr2a</i>      | 1.00 ± 0.07 # | CTRL | 0.41 ± 0.11 *  | 0.31 ± 0.08 *   | 0.23 ± 0.02 *  | 0.21 ± 0.13 *   |
|                   |               | FIA  | 0.52 ± 0.12 *  | 0.21 ± 0.06 *   | 0.16 ± 0.04 *  | 0.16 ± 0.05 *   |
| <i>htr2b</i>      | 1.00 ± 0.04   | CTRL | 0.92 ± 0.77    | 1.08 ± 0.15     | 0.85 ± 0.04    | 0.88 ± 0.40     |
|                   |               | FIA  | 1.35 ± 0.41    | 0.89 ± 0.24     | 0.67 ± 0.17    | 1.01 ± 0.31     |
| <i>htr2c</i>      | 1.03 ± 0.32 # | CTRL | 0.78 ± 0.13    | 0.54 ± 0.14     | 0.81 ± 0.24    | 0.68 ± 0.28     |
|                   |               | FIA  | 0.54 ± 0.21    | 0.36 ± 0.14 *   | 0.69 ± 0.28    | 0.55 ± 0.23     |
| <i>muor</i>       | 1.00 ± 0.11   | CTRL | 1.40 ± 1.69    | 1.00 ± 0.40     | 0.64 ± 0.26    | 0.63 ± 0.38     |
|                   |               | FIA  | 1.16 ± 0.35    | 0.55 ± 0.20     | 0.77 ± 0.22    | 0.49 ± 0.16     |
| <i>kor1</i>       | 1.01 ± 0.24   | CTRL | 0.55 ± 0.62    | 0.57 ± 0.12     | 0.50 ± 0.21    | 0.64 ± 0.37     |
|                   |               | FIA  | 0.77 ± 0.37    | 0.66 ± 0.18     | 0.79 ± 0.17    | 0.67 ± 0.30     |
| <i>dor2</i>       | 1.13 ± 0.74 # | CTRL | 0.64 ± 0.02    | 0.33 ± 0.09 *   | 0.31 ± 0.06 *  | 0.85 ± 0.22     |
|                   |               | FIA  | 0.53 ± 0.07    | 0.23 ± 0.09 *   | 0.55 ± 0.34    | 0.47 ± 0.50     |

| Two-way ANOVA |        |          |                 |      |     |     |     |          |     | One-way ANOVA |                |
|---------------|--------|----------|-----------------|------|-----|-----|-----|----------|-----|---------------|----------------|
| Parameters    | Time   | Stimulus | Time × Stimulus | Time |     |     |     | Stimulus |     | Parameters    | i.p. injection |
|               |        |          |                 | 4h   | 24h | 48h | 72h | CTRL     | FIA |               |                |
| <i>gr1</i>    | <0.001 | -        | 0.013           | c    | a   | b   | a   | -        | -   | <i>gr1</i>    | -              |
| <i>pomc</i>   | 0.013  | -        | 0.053           | ab   | a   | b   | ab  | -        | -   | <i>pomc</i>   | -              |
| <i>htr1a</i>  | <0.001 | -        | 0.032           | b    | a   | a   | a   | -        | -   | <i>htr1a</i>  | <0.001         |
| <i>htr2a</i>  | <0.001 | -        | -               | b    | a   | a   | a   | -        | -   | <i>htr2a</i>  | <0.001         |
| <i>htr2b</i>  | -      | -        | -               | -    | -   | -   | -   | -        | -   | <i>htr2b</i>  | -              |
| <i>htr2c</i>  | 0.011  | 0.02     | -               | ab   | a   | b   | ab  | B        | A   | <i>htr2c</i>  | 0.007          |
| <i>muor</i>   | 0.01   | -        | -               | b    | ab  | a   | a   | -        | -   | <i>kor1</i>   | -              |
| <i>kor1</i>   | -      | -        | -               | -    | -   | -   | -   | -        | -   | <i>muor</i>   | -              |
| <i>dor2</i>   | 0.004  | -        | -               | ab   | a   | ab  | b   | -        | -   | <i>dor2</i>   | 0.004          |

Values are presented as means ± SD (n=9). P-values from two-way and one-way ANOVA ( $p \leq 0.05$ ). If interaction was significant, Tukey post hoc test was used to identify differences in the experimental treatments. Different capital letters stand for significant differences among sampling time. Low case letters represent differences between the two stimuli. Different symbols indicate significant differences between i.p. injected and undisturbed fish.
